# Supplementary material for: Comparative analysis of Hymenasplenium (Aspleniaceae) chloroplast genomes from China
Source: PubMed Central journal article supplement (PMC11662895; doi:10.7717/peerj.18667), 2024-12-18

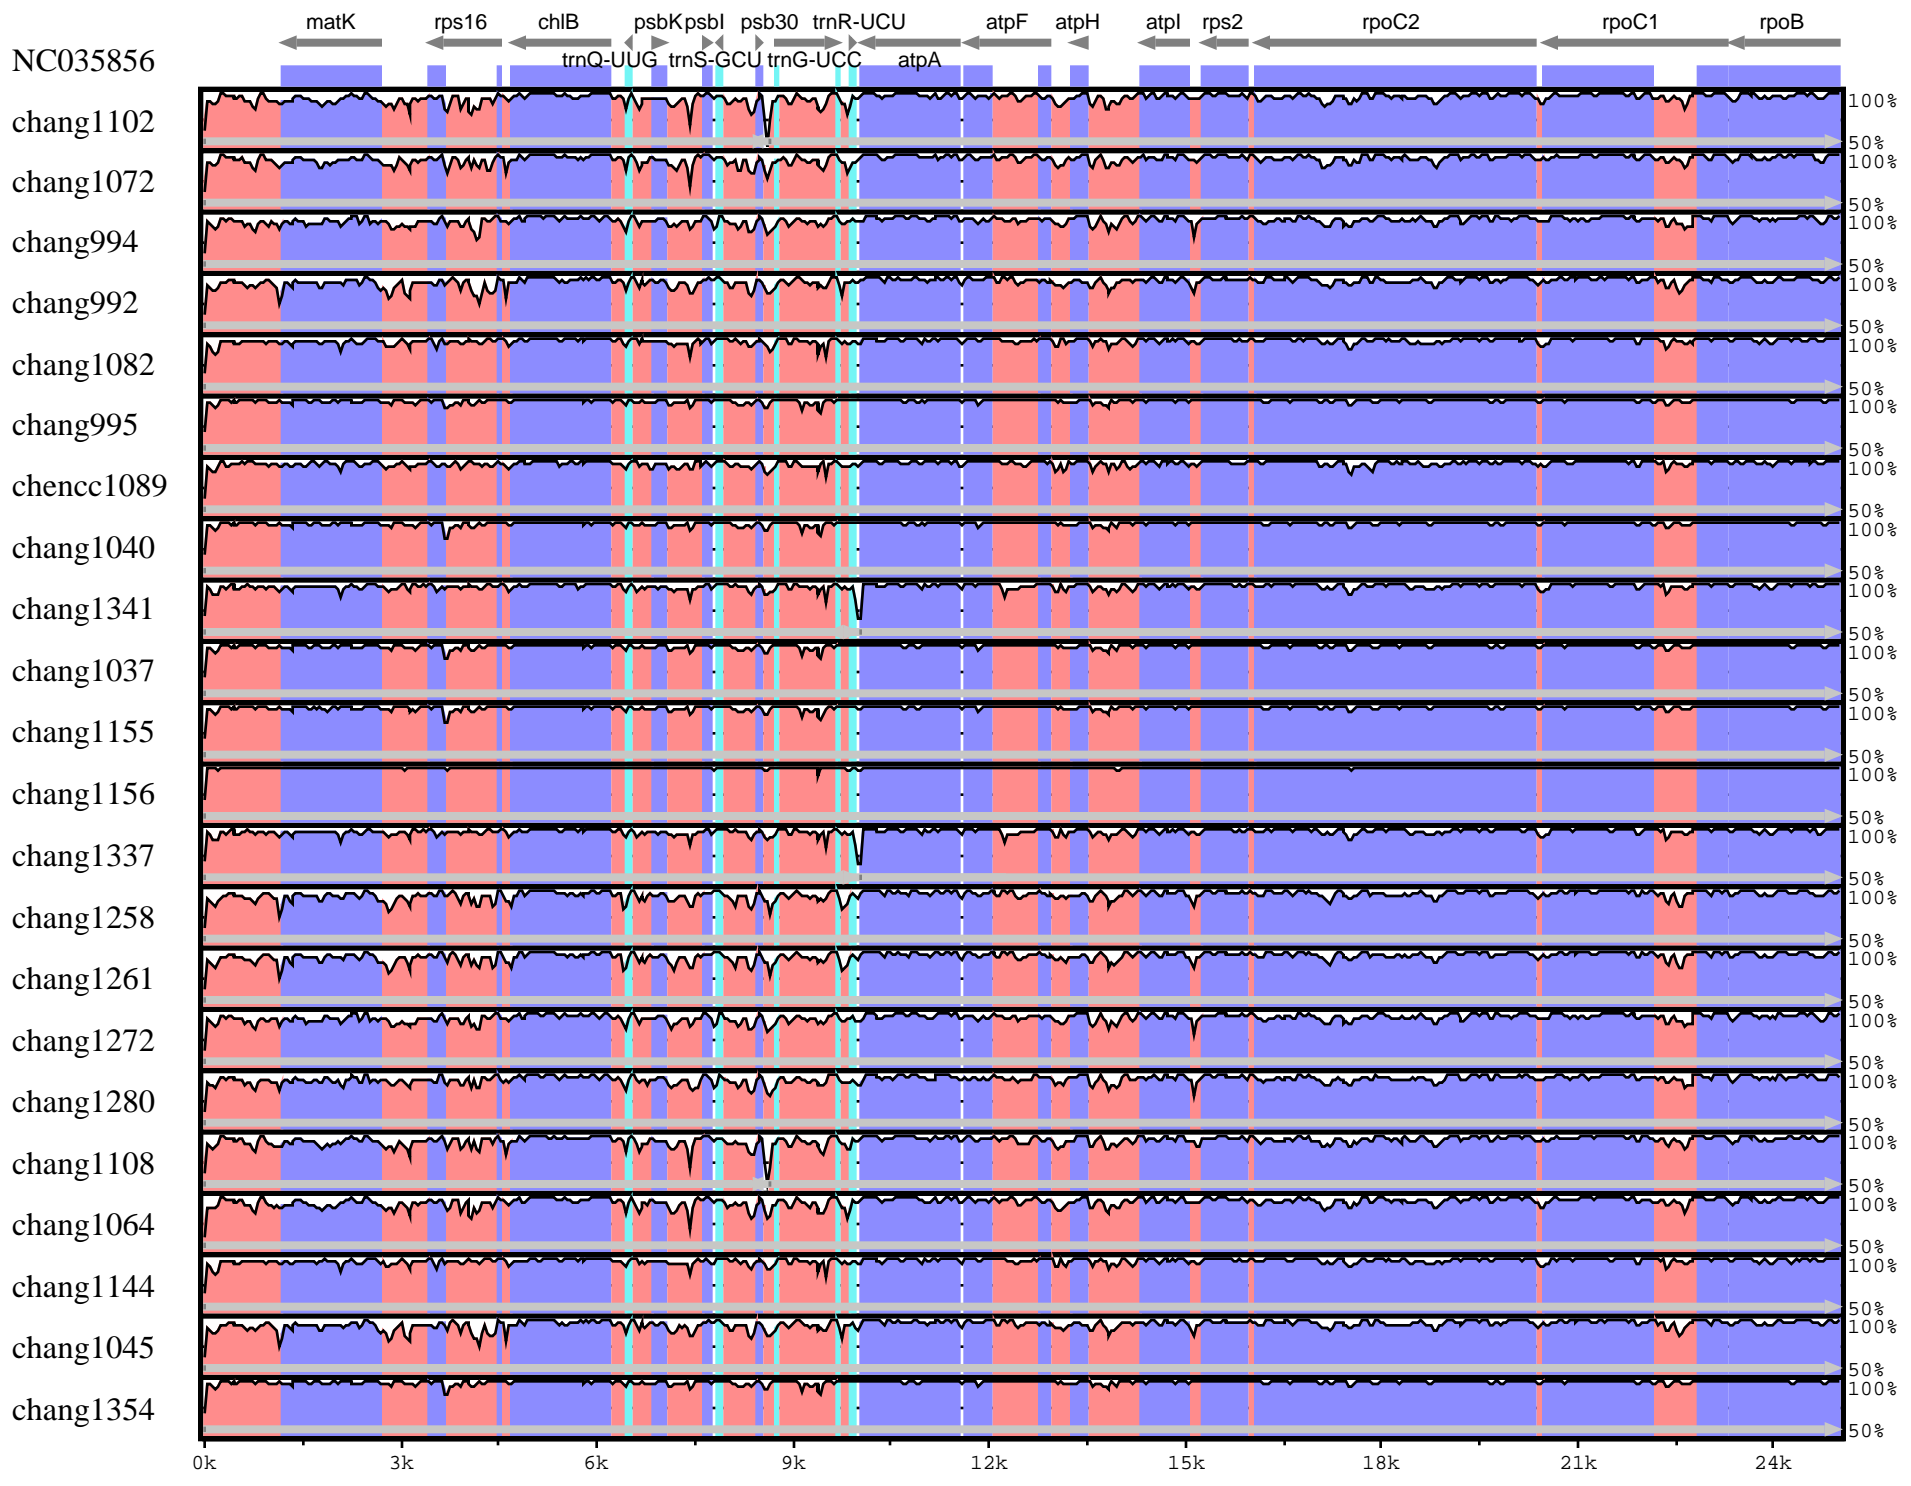

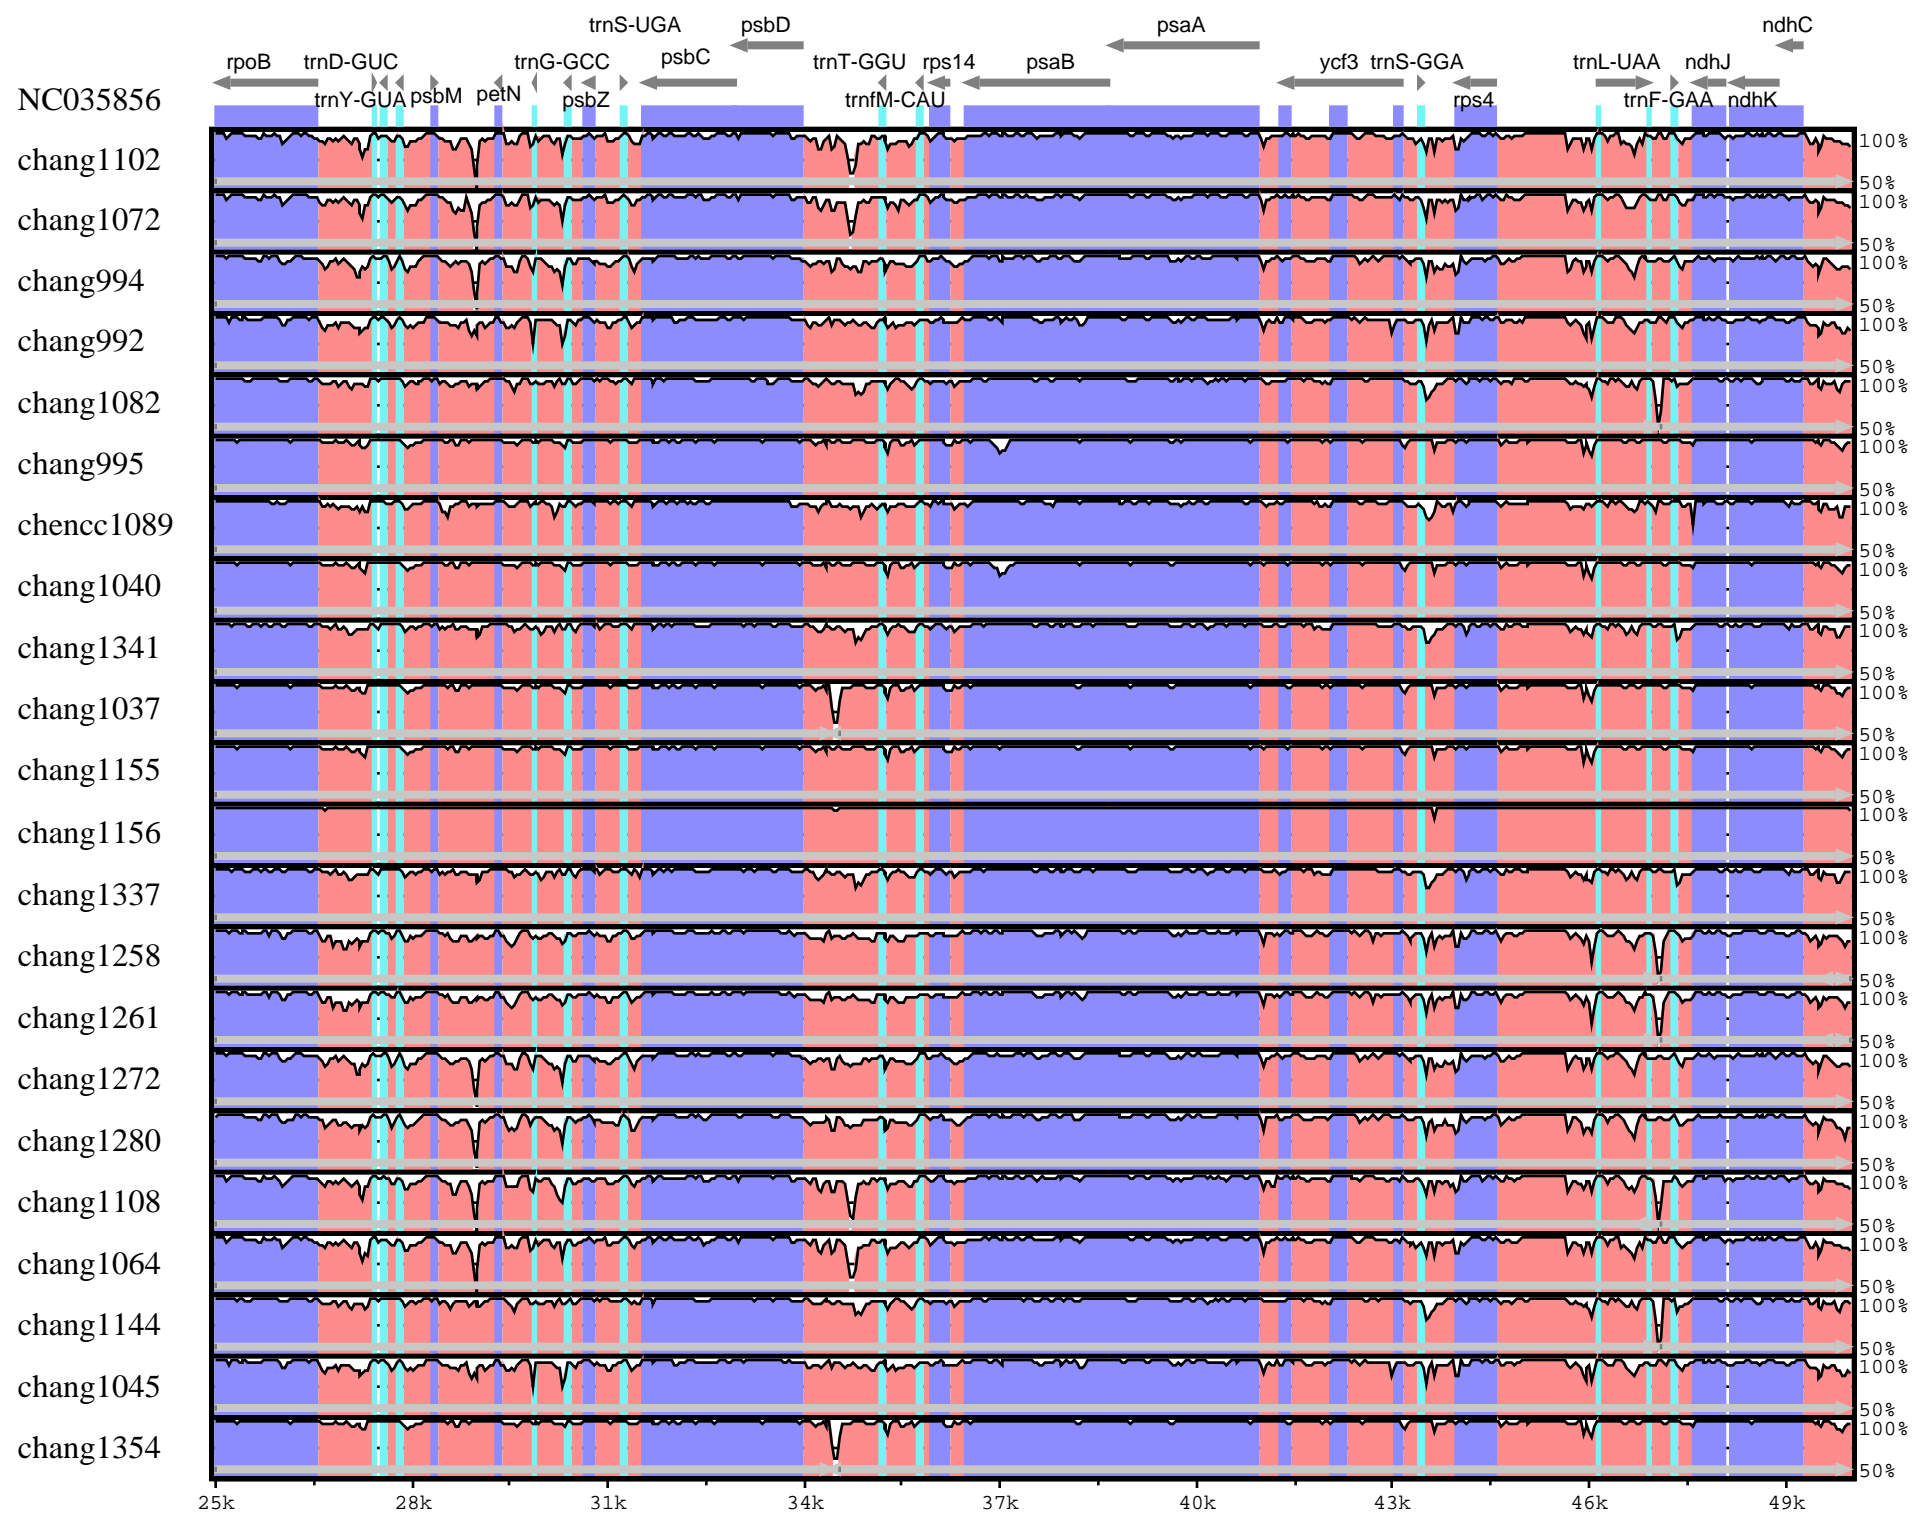

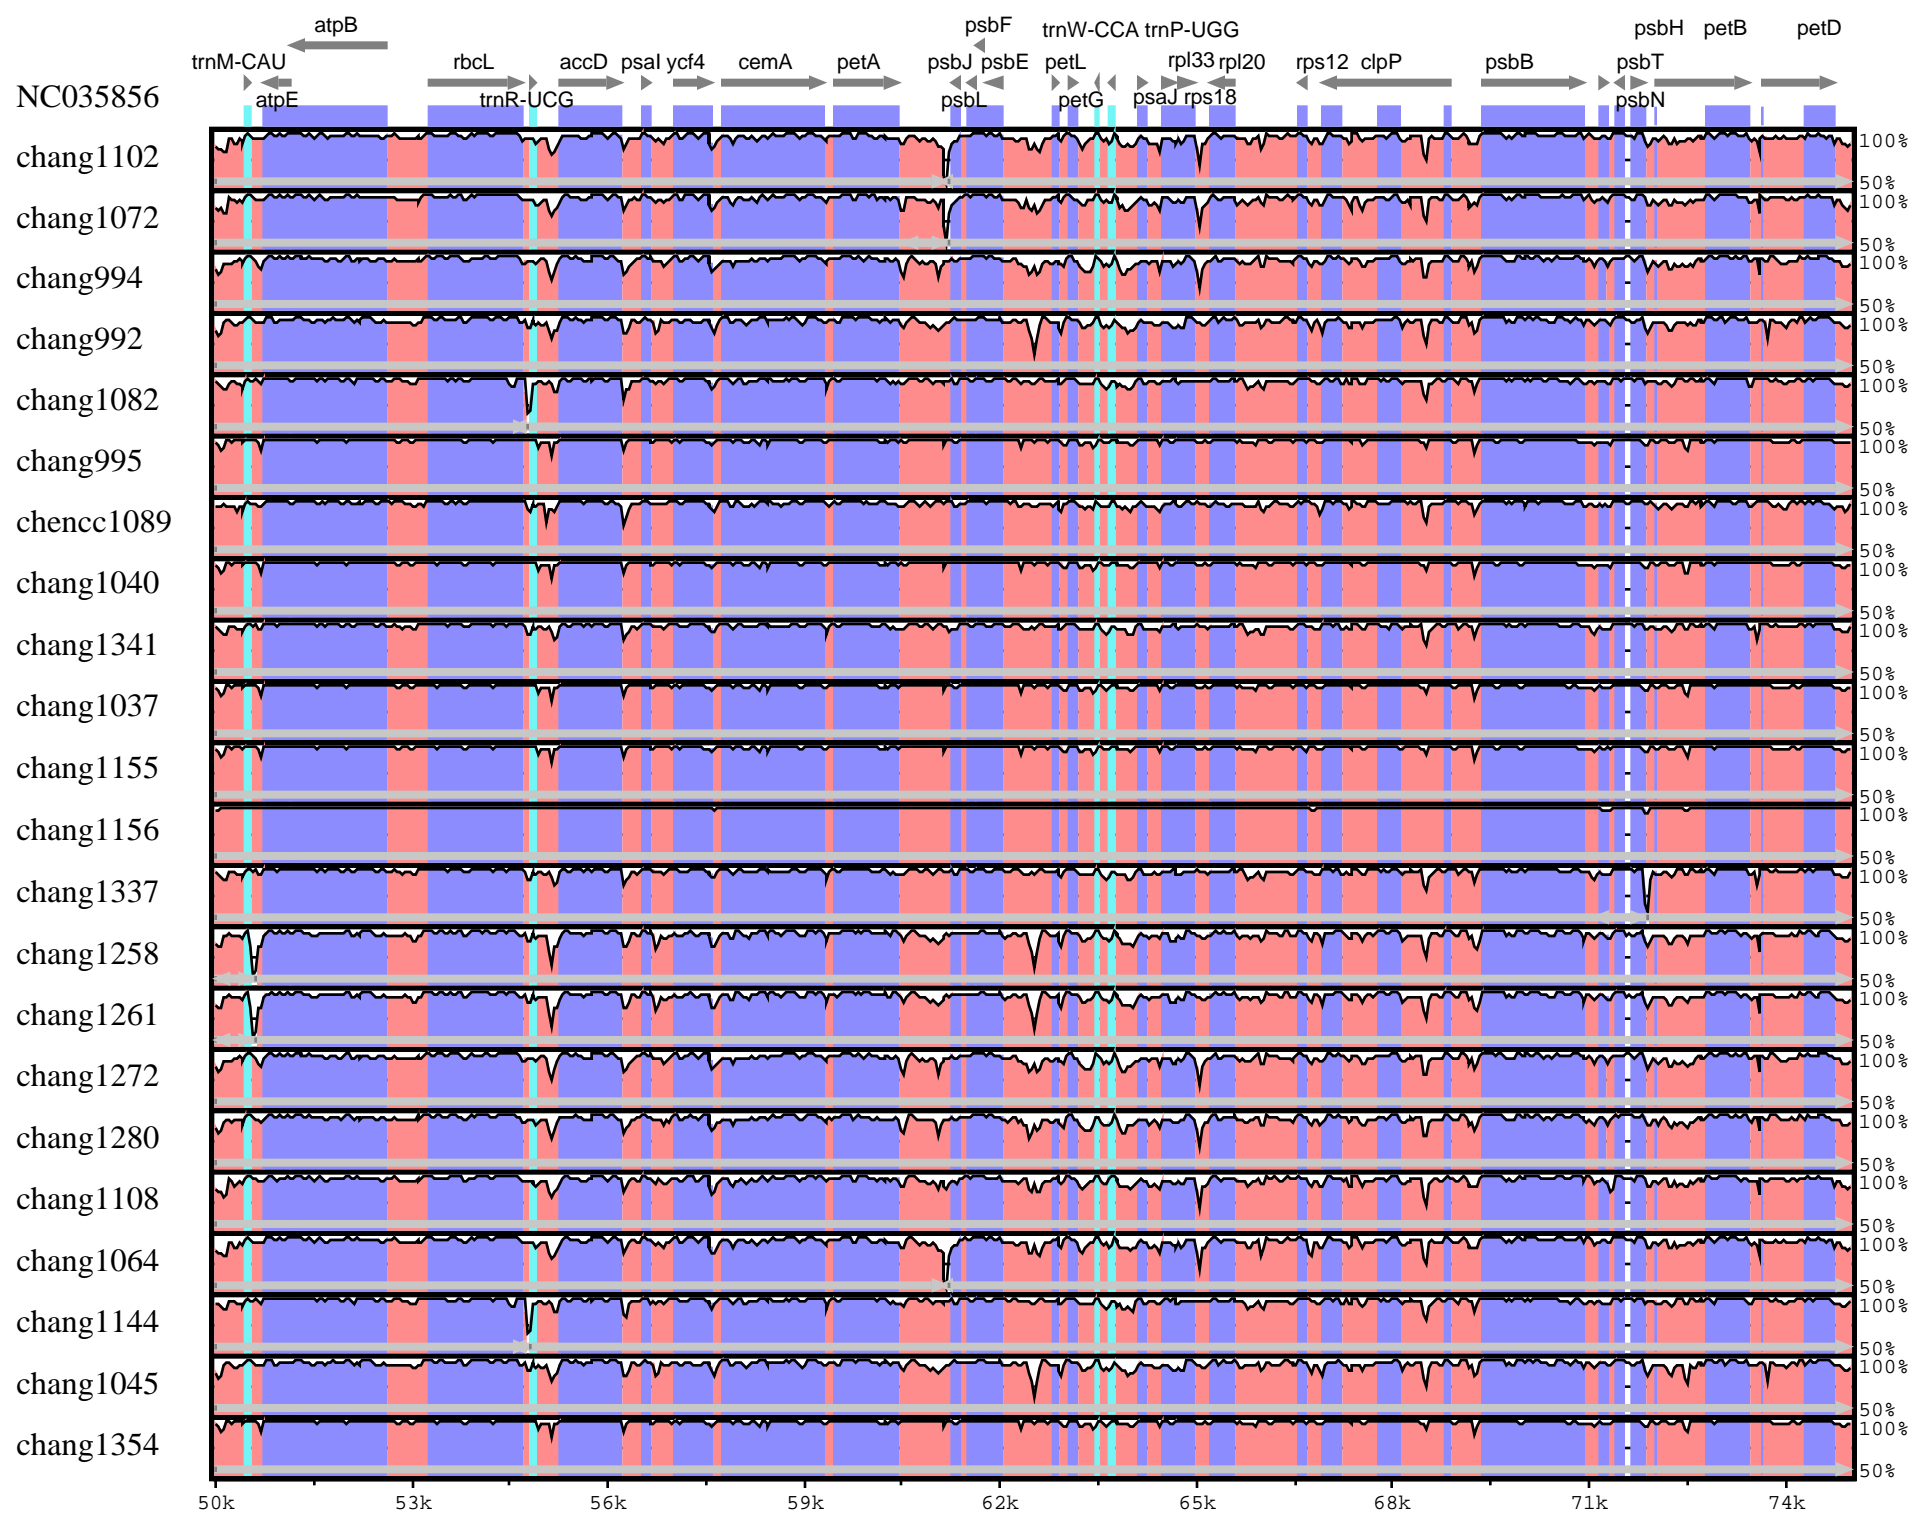

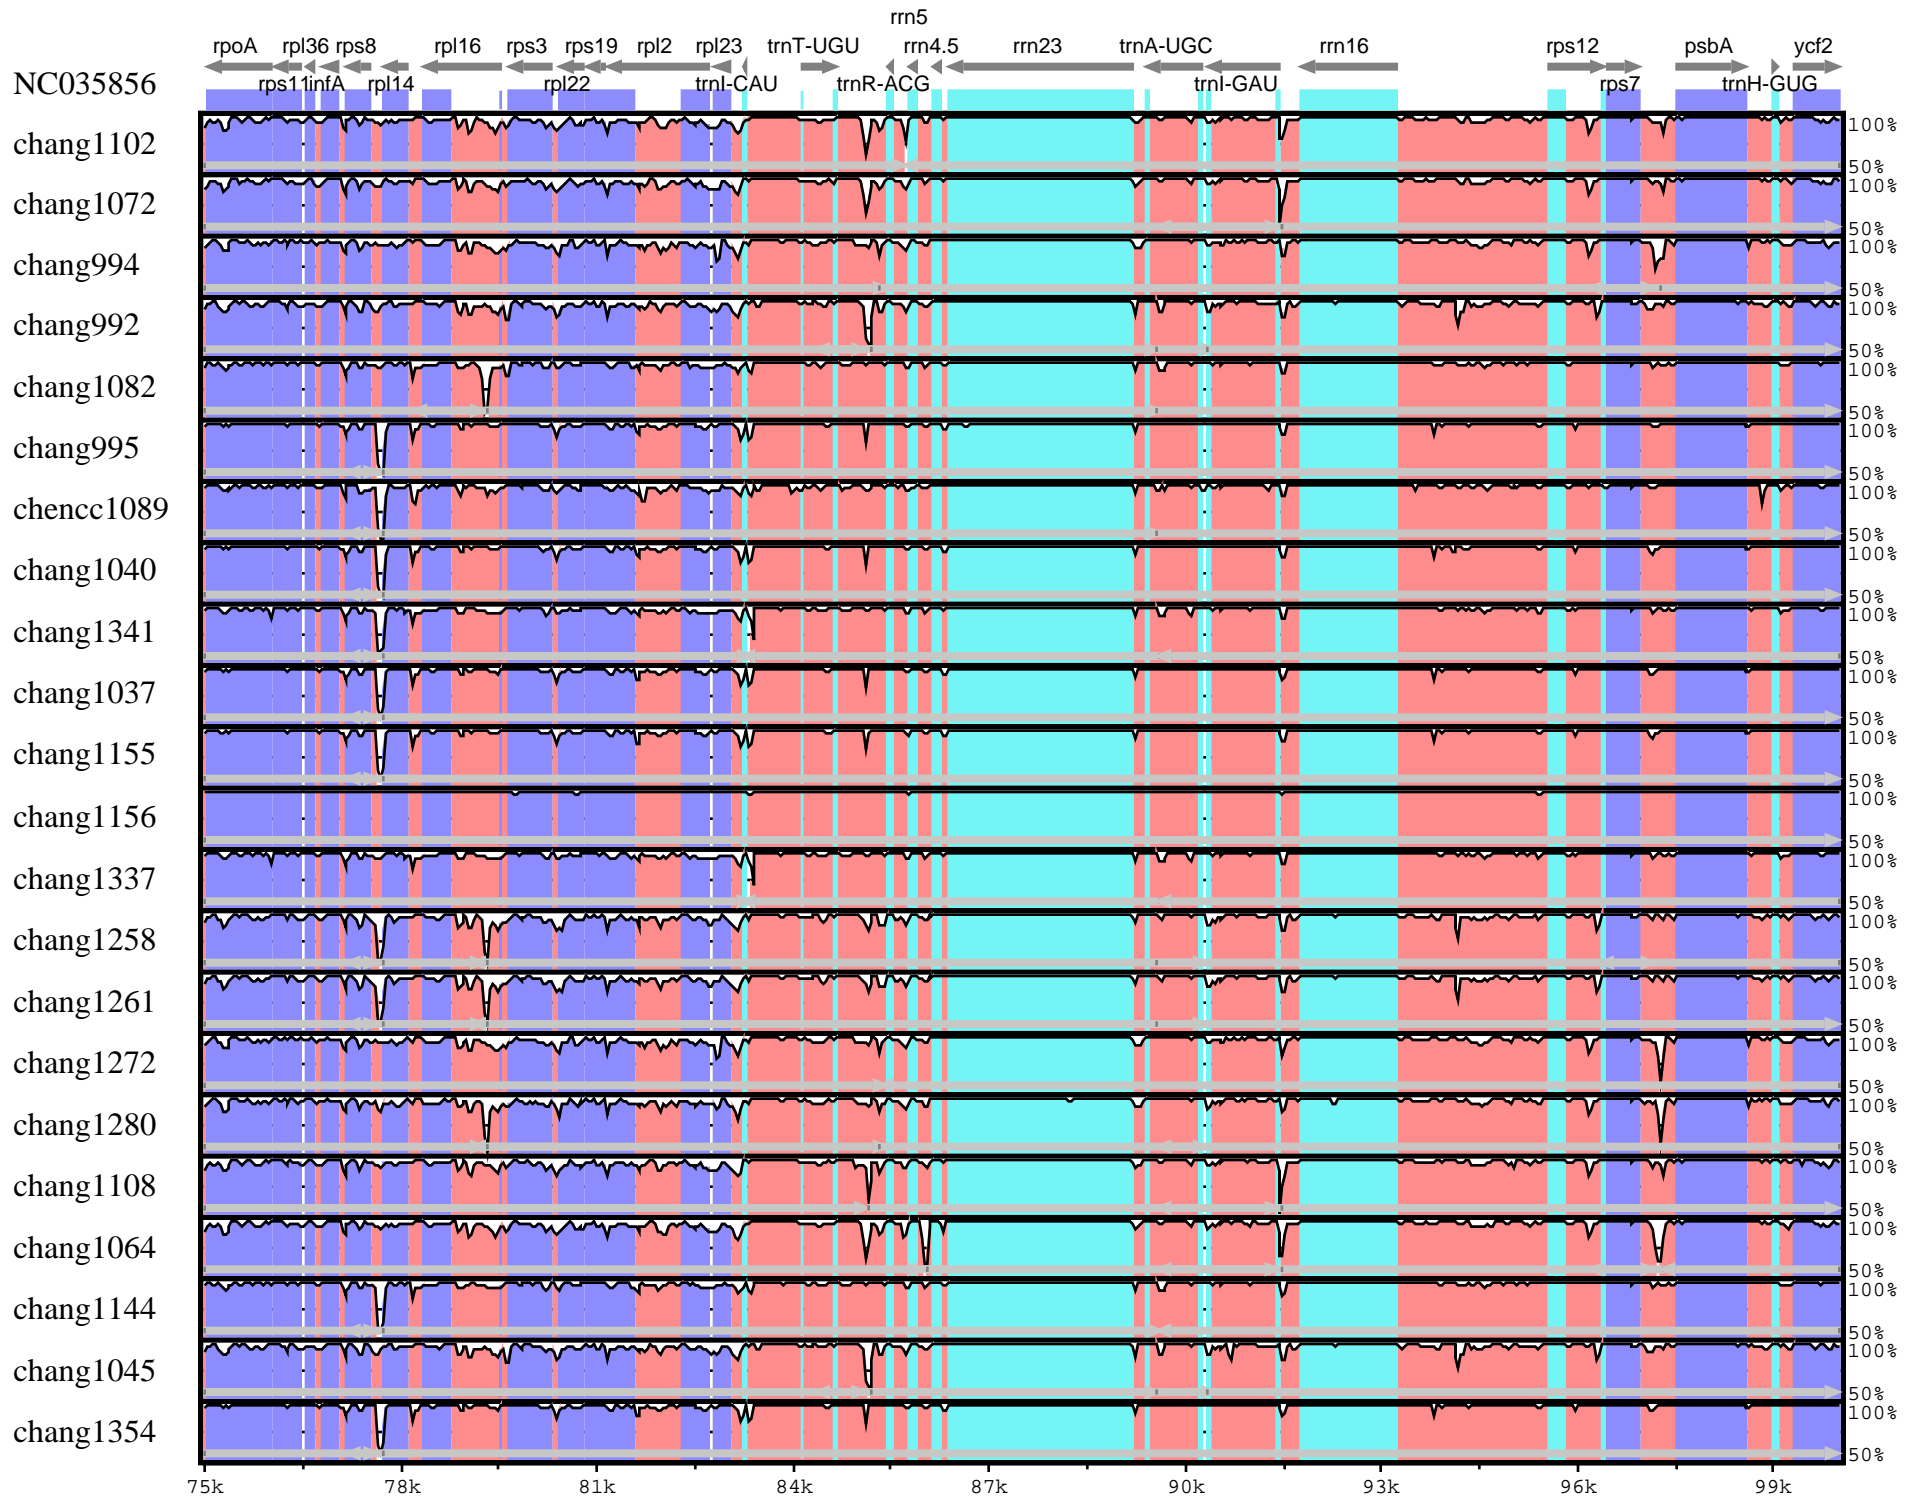

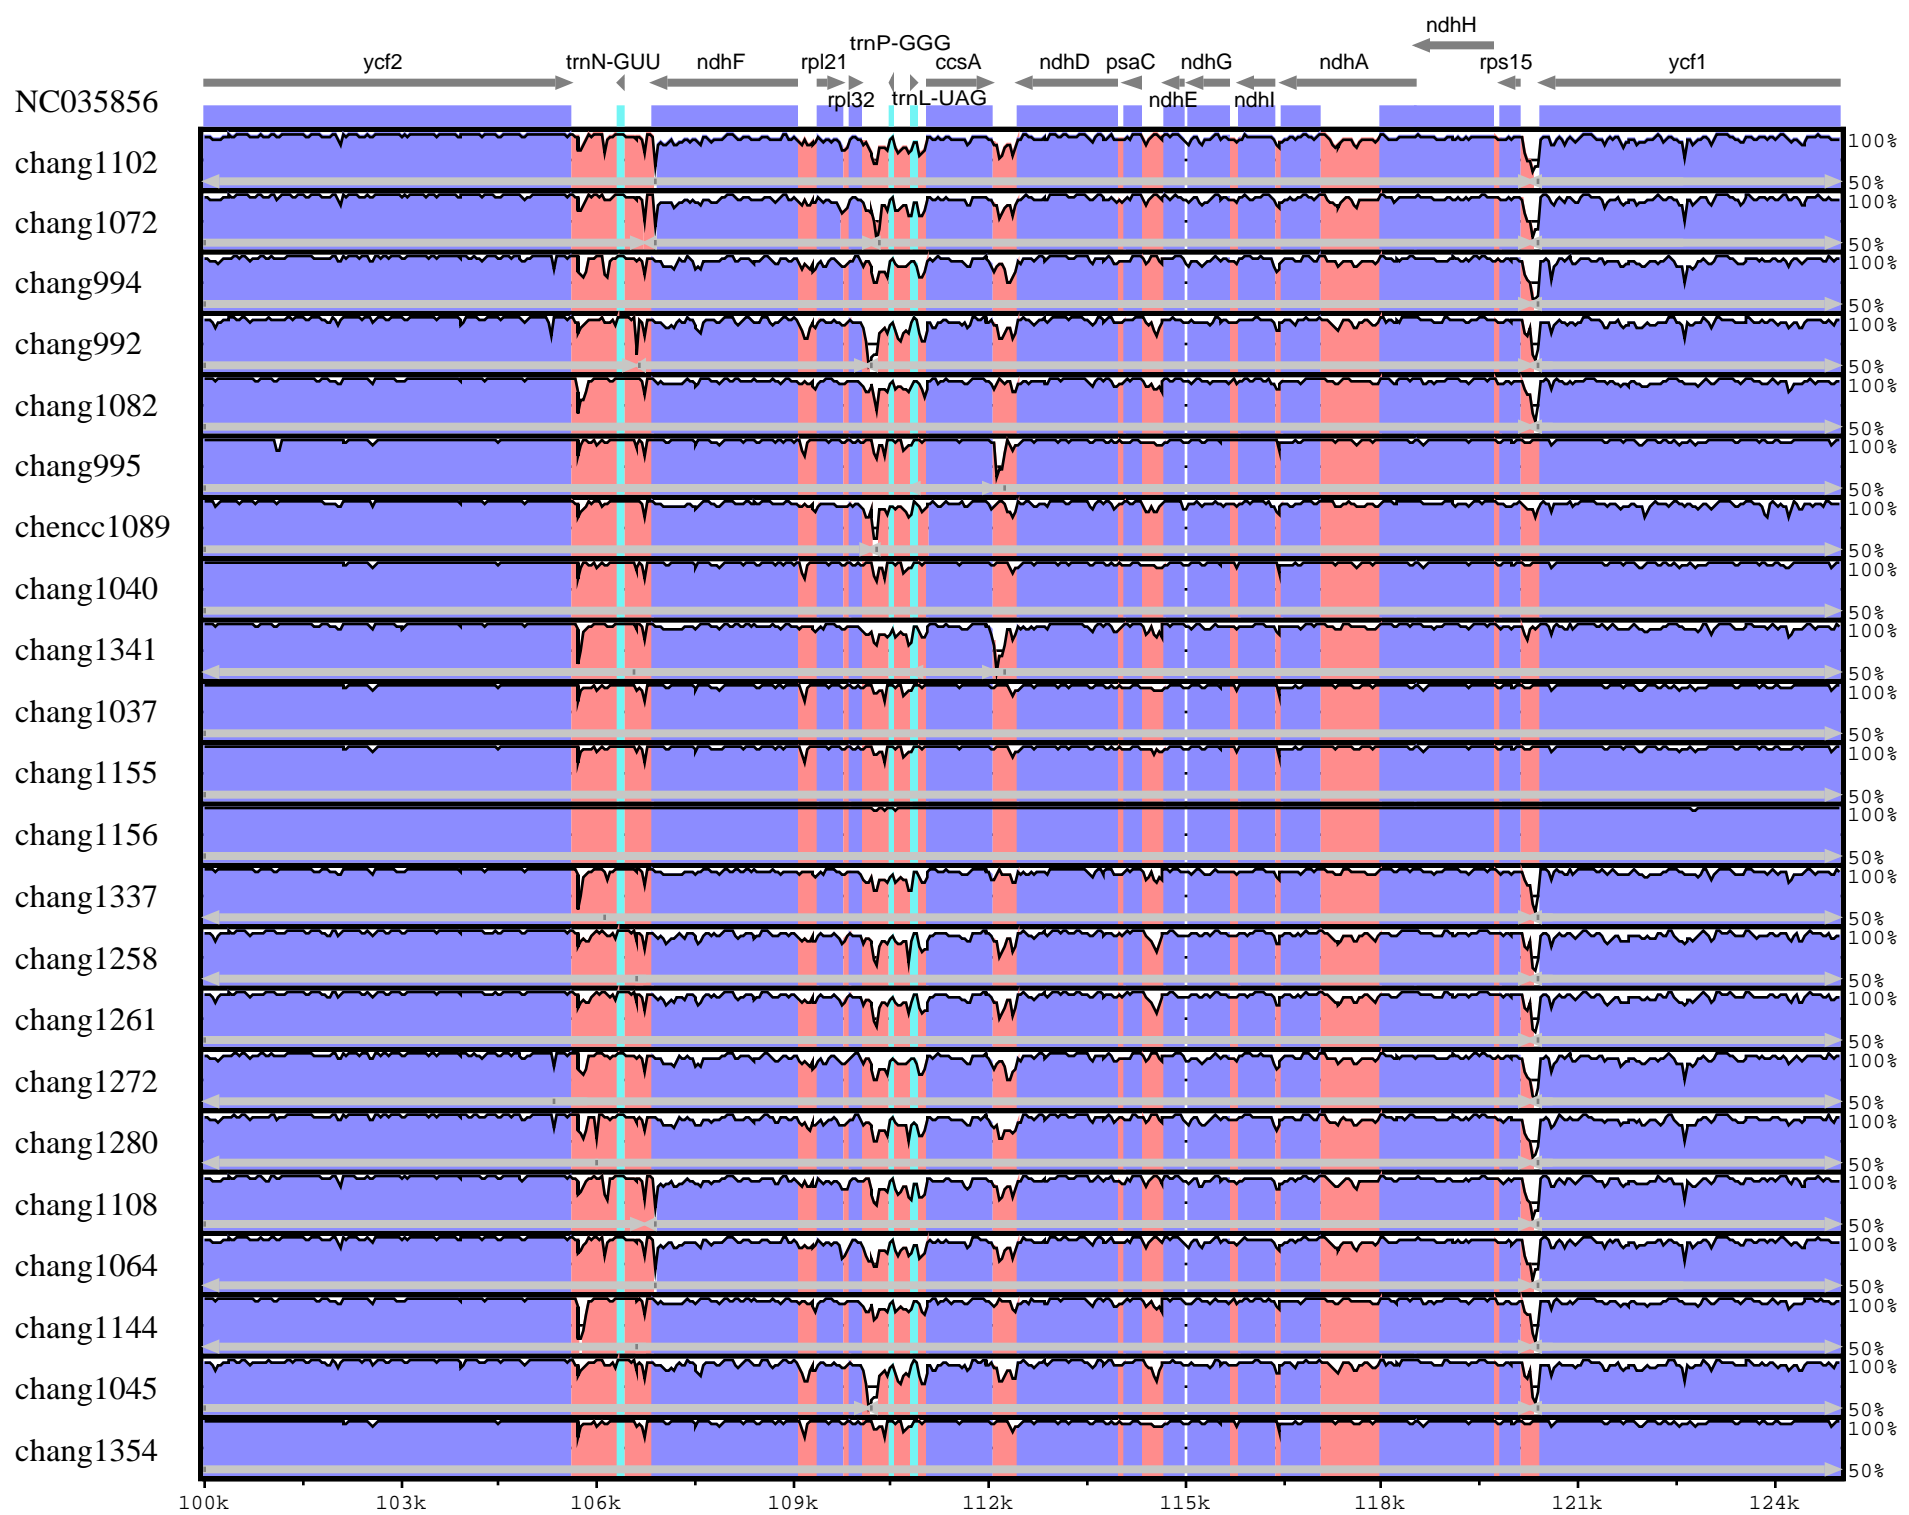

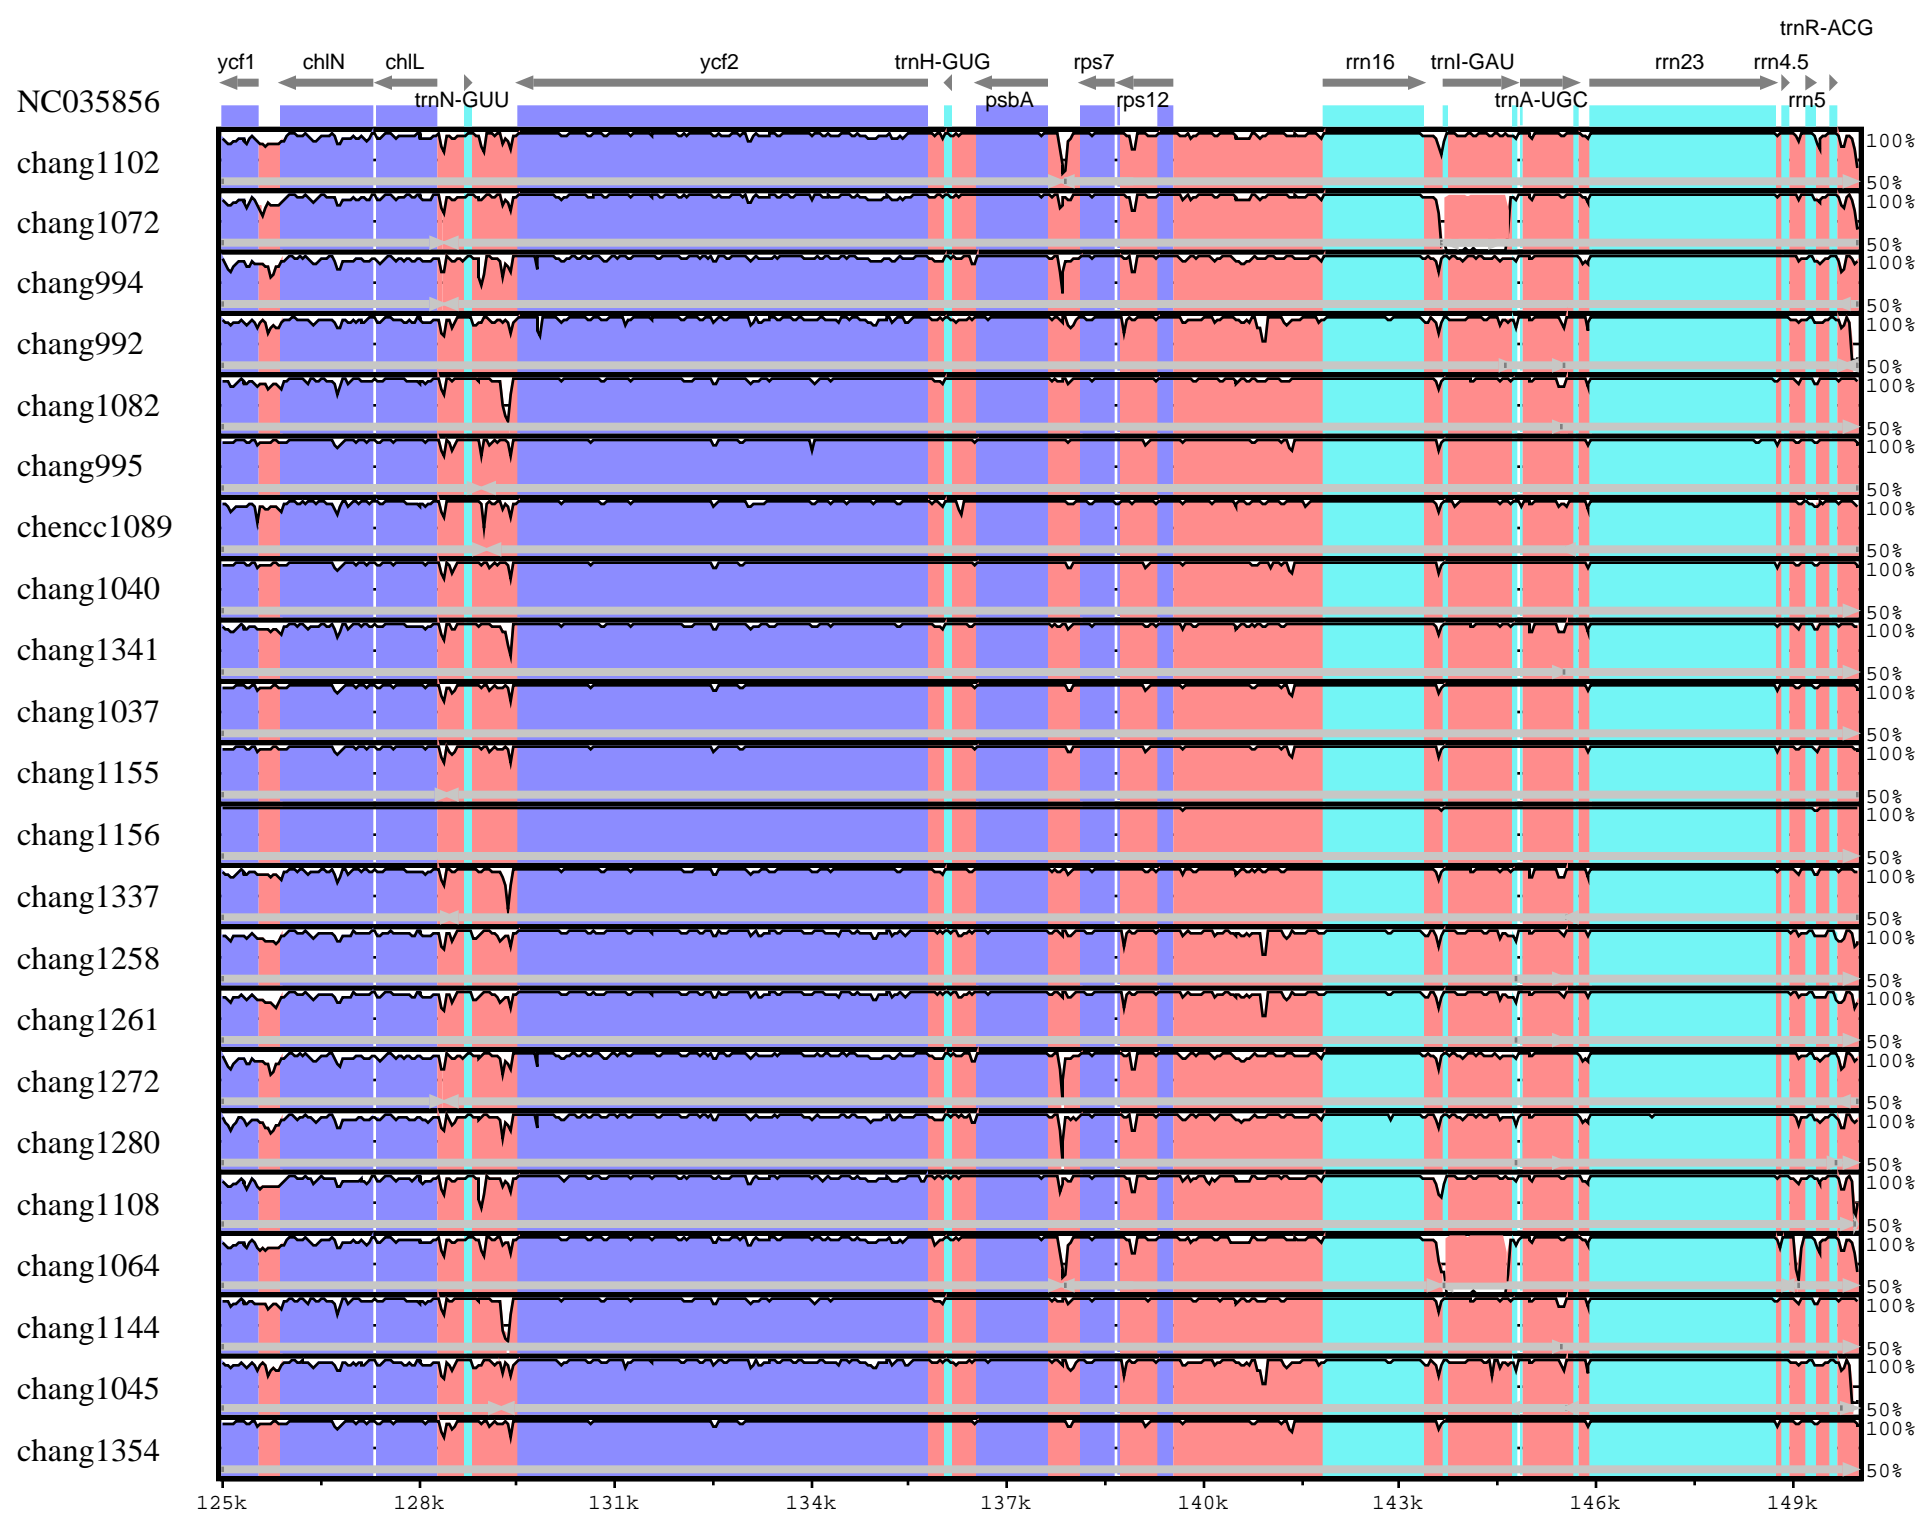

Supplement: peerj-12-18667-s001.pdf [file peerj-12-18667-s001.pdf]
